# Supplementary material for: A Panax notoginseng Root Tip Meristem Biosensor and Its Sensing Kinetics for Five Important Nitrogen Nutrients
Source: Hindawi journal article supplement (doi:10.1155/2021/5526850), 2021-01-01
Supplement: f1 [file 5526850.f1.docx]

SUPPORT MATERIAL

**A *Panax notoginseng* root tip meristem biosensor and its sensing kinetics for five important nitrogen nutrients**

Zi Qing Zheng, 1 Bo Niu,1 Ding Qiang Lu1, 2*, Guang Chang Pang1, 2*

1 College of Biotechnology & food Science, Tianjin University of Commerce, Tianjin, 300314, China.

2 Tianjin key laboratory of food biotechnology, Tianjin, 300314, China.

Correspondence should be addressed to Ding Qiang Lu; [dqlu@tjcu.edu.cn](mailto:dqlu@tjcu.edu.cn). Guang Chang Pang; [pgc@tjcu.edu.cn](mailto:pgc@tjcu.edu.cn).

(Zi Qing Zheng1 and Bo Niu1 are the co-first authors. Ding Qiang Lu and Guang Chang Pang are co-corresponding authors.)

Table S1: Hyperbolic equations of *P. notoginseng* root tip meristems of different ages interacting with five nitrogen nutrients

| nitrogen forms | *Panax notoginseng* age | Hyperbolic equation | Coefficient of determination (R2) |
| --- | --- | --- | --- |
| sodium nitrate | 2-year-old | ΔI% = 8.247510−20C/(0.1177 + C10−21) | 0.9860 |
| 3-year-old | ΔI% =6.225910−21C/(1.0666 + C10−22) | 0.9516 |
| 4-year-old | ΔI% =8.5887×10−19C/(0.1104 + C×10−22) | 0.9684 |
| Urea | 2-year-old | ΔI% =8.1392×10−19C/(0.0058 + C×10−20) | 0.9406 |
| 3-year-old | ΔI% =7.8886×10−17C/(0.0056 + C×10−18) | 0.9611 |
| 4-year-old | ΔI% =8.5459×10−18C/(0.1426 + C×10−19) | 0.9839 |
| Sodium glutamate | 2-year-old | ΔI% =7.8460×10−18C/(0.1895 + C×10−19) | 0.9642 |
| 3-year-old | ΔI% =7.9635×10−17C/(0.3133 + C×10−18) | 0.9920 |
| 4-year-old | ΔI% =8.7155×10−18C/(0.2308 + C×10−19) | 0.9900 |
| IMP-Na2 | 2-year-old | ΔI% =7.9600×10−18C/(0.0905 + C×10−19) | 0.9909 |
| 3-year-old | ΔI% =7.9161×10−18C/(0.0579 + C×10−19) | 0.9978 |
| 4-year-old | ΔI% =8.1942×10−15C/(0.1413 + C×10−16) | 0.9924 |
| GMP-Na2 | 2-year-old | ΔI% =8.2442×10−18C/(0.1688 + C×10−19) | 0.9823 |
| 3-year-old | ΔI% =7.9870×10−18C/(0.1838 + C×10−19) | 0.9811 |
| 4-year-old | ΔI% =9.2654×10−15C/(0.0809 + C×10−16) | 0.9948 |

Table S2: Double reciprocal linear regression equations of *P. notoginseng* root tip meristems of different ages interacting with five nitrogen nutrients

| nitrogen forms | *Panax notoginseng* age | Double reciprocal equation | Coefficient of determination (R2) |
| --- | --- | --- | --- |
| sodium nitrate | 2-year-old | 1/ΔI (%) = 0.0016×10−211/C + 0.0119 | 0.9894 |
| 3-year-old | 1/ΔI (%) = 0.03202×10−221/C + 0.01173 | 0.9587 |
| 4-year-old | 1/ΔI (%) = 9.88265×10−241/C + 0.01185 | 0.9764 |
| Urea | 2-year-old | 1/ΔI (%) = 6.6439×10−241/C + 0.0124 | 0.9538 |
| 3-year-old | 1/ΔI (%) = 6.4708×10−231/C + 0.0128 | 0.9664 |
| 4-year-old | 1/ΔI (%) = 0.0015×10−191/C + 0.0119 | 0.9891 |
| Sodium glutamate | 2-year-old | 1/ΔI (%) = 0.0018×10−191/C + 0.0132 | 0.9579 |
| 3-year-old | 1/ΔI (%) = 0.0042×10−181/C + 0.0123 | 0.9965 |
| 4-year-old | 1/ΔI (%) = 0.0023×10−181/C + 0.0120 | 0.9865 |
| IMP-Na2 | 2-year-old | 1/ΔI (%) = 0.0012×10−191/C + 0.0126 | 0.9959 |
| 3-year-old | 1/ΔI (%) = 7.1704×10−231/C + 0.0127 | 0.9833 |
| 4-year-old | 1/ΔI (%) = 0.0017×10−161/C + 0.0123 | 0.9958 |
| GMP-Na2 | 2-year-old | 1/ΔI (%) = 0.0019×10−191/C + 0.0123 | 0.9935 |
| 3-year-old | 1/ΔI (%) = 0.0019×10−191/C + 0.0130 | 0.9736 |
| 4-year-old | 1/ΔI (%) =9.1548×10−201/C + 0.0107 | 0.9939 |

Table S3: Stability of the *P. notoginseng* root tip meristem biosensor.

| Days | Current ratio (%) |
| --- | --- |
| 1 | 100.00 |
| 2 | 97.66 |
| 3 | 89.42 |
| 4 | 78.74 |
| 5 | 51.25 |
| 6 | 44.18 |

**Fig. S1 Optimization of detection potential. 1 × 10−20 mol/L sodium nitrate solution [blank solution] was used as an example in the figure.** The change in the steady-state current value before and after the addition of five types of nitrogen source solutions was used to measure the influence of electric potential on the electrochemical performance of the plant sensor. As shown in Figure S1, the current value was the largest when the voltage was −0.38 V. The above results demonstrated that the sensing signal was the strongest when a constant potential of −0.38 V was used during the measurement of the five nitrogen source solutions with the *Panax notoginseng* root-tip meristem biosensors.

|  |  |  |
| --- | --- | --- |
|  |  |  |
|  |  |  |
|  |  |  |
|  |  |  |

**Figure S2: Current change rates of biosensors constructed with *P. notoginseng* root-tip meristems with** **different ages in sensing five nitrogen nutrients within the set concentration range.**

|  |  |  |
| --- | --- | --- |
|  |  |  |
|  |  |  |
|  |  |  |
|  |  |  |

**Figure S3: Current change rates and their hyperbolic fitting curve of the biosensors that were constructed with** **different ages of *P. notoginseng* root-tip meristems in sensing** **five nitrogen nutrients.**

|  |  |  |
| --- | --- | --- |
|  |  |  |
|  |  |  |
|  |  |  |
|  |  |  |

**Figure S4: Double reciprocal-based fitting curve of the biosensors constructed with root-tip meristem with different ages of *P. notoginseng* in sensing** **five nitrogen nutrients.**
